# Supplementary material for: Maternal miR-202-5p is required for zebrafish primordial germ cell migration by protecting small GTPase Cdc42
Source: PubMed Central journal article supplement — J Mol Cell Biol. 2019 Nov 19;12(7):530–42. doi: 10.1093/jmcb/mjz103 (PMC7493028; doi:10.1093/jmcb/mjz103), 2019-11-19
Supplement: jmcb-2019-0126_r2_supplementary_material_mjz103.pdf [file jmcb-2019-0126_r2_supplementary_material_mjz103.pdf]

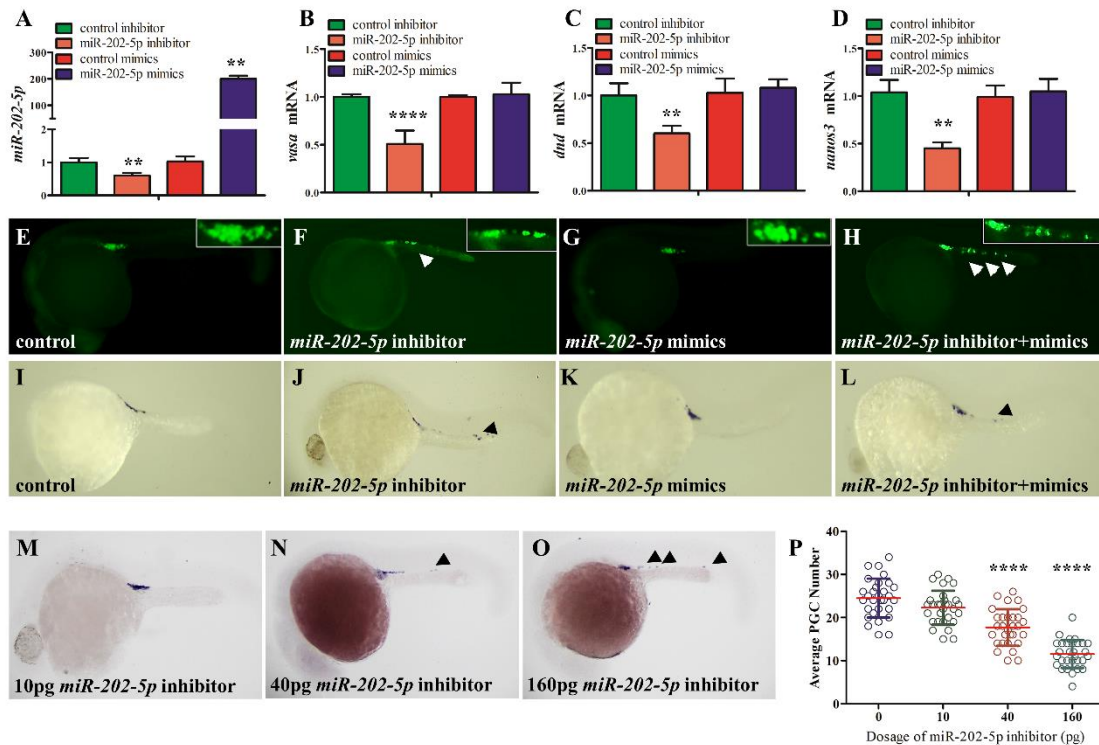

**Supplementary Figure S1. Knockdown of miR-202-5p led to PGC reduction and mislocalization in zebrafish.** (A-D) qRT-PCR analyses of miR-202-5p, *vasa*, *dnd* and *nanos3* in control and miR-202-5p mimics/inhibitor injected embryos, respectively. (E-G) the representative images of GFP-positive PGCs in transgenic zebrafish (Tg *kop:EGFP-UTR-nos3*) embryos at prim 5 stage. (E) un-injected control; (F) embryo injected with 40 pg miR-202-5p inhibitor; (G) embryo injected with 40 pg miR-202-5p mimics; (H) embryo co-injected with 40 pg miR-202-5p inhibitor and 40 pg miR-202-5p mimics. The panel boxes were magnified image. (I-L) whole mount *in situ* hybridization of *vasa* in embryos as above. (M-O) the representative images of PGCs in embryos injected with different dosages of miR-202-5p inhibitor. (P) the average PGC number in embryos injected with different dosages of miR-202-5p inhibitor. Arrow heads indicated the mislocalized PGCs. \*\*,  $p < 0.01$ ; \*\*\*\*,  $p < 0.0001$ .

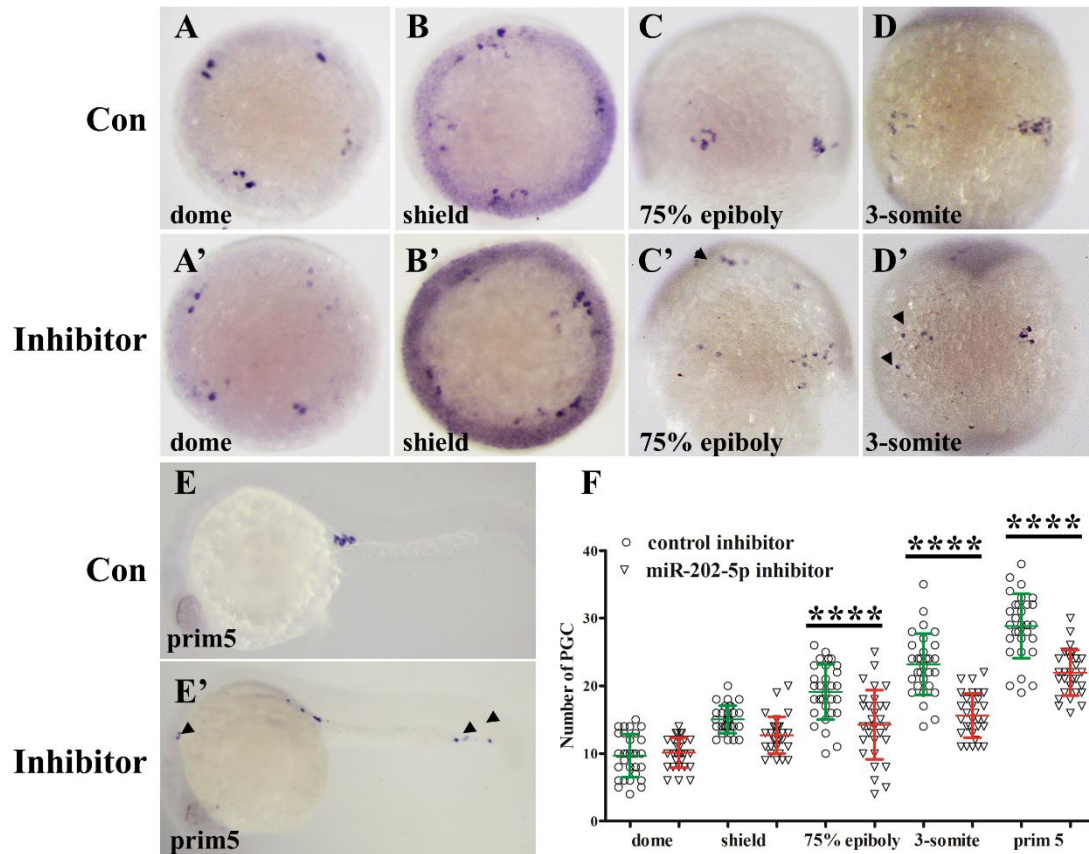

**Supplementary Figure S2. Knockdown of miR-202-5p affected PGC migration.** Whole mount *in situ* hybridization of *vasa* in embryos injected with miR-202-5p inhibitor or control inhibitor from dome to prim5 stages. (A-E) control inhibitor (Con) injected embryos, (A'-E') miR-202-5p inhibitor (Inhibitor) injected embryos. (F) average numbers of PGCs in control inhibitor and miR-202-5p inhibitor injected embryos. Arrow heads indicated the mislocalized PGCs. \*\*\*\*,  $p < 0.0001$ .

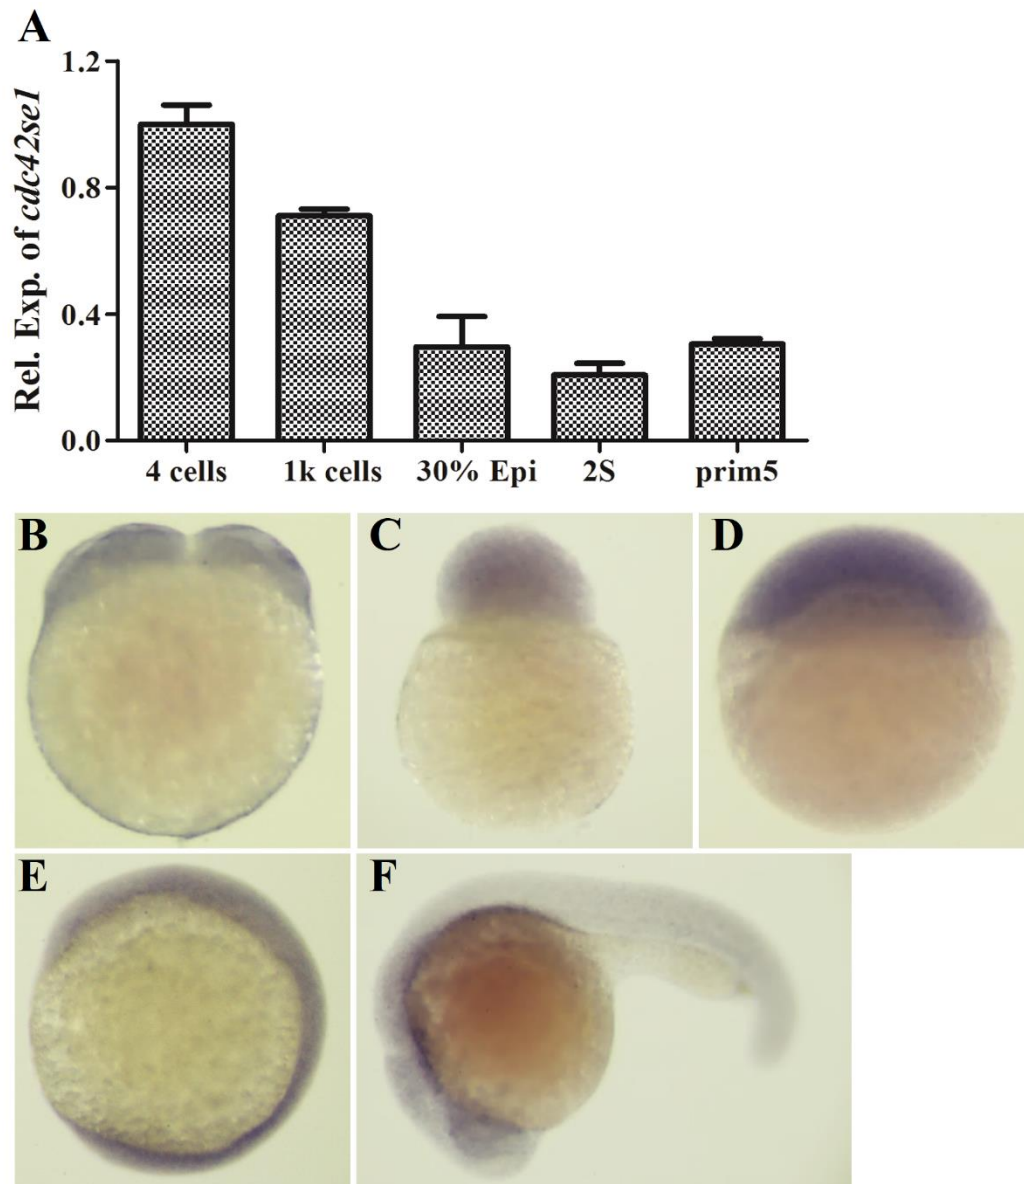

**Supplementary Figure S3.** The expression patterns of *Cdc42se1* during embryogenesis. (A) qRT-PCR and (B-F)WISH analysis of *cdc42se1* mRNA during embryogenesis.

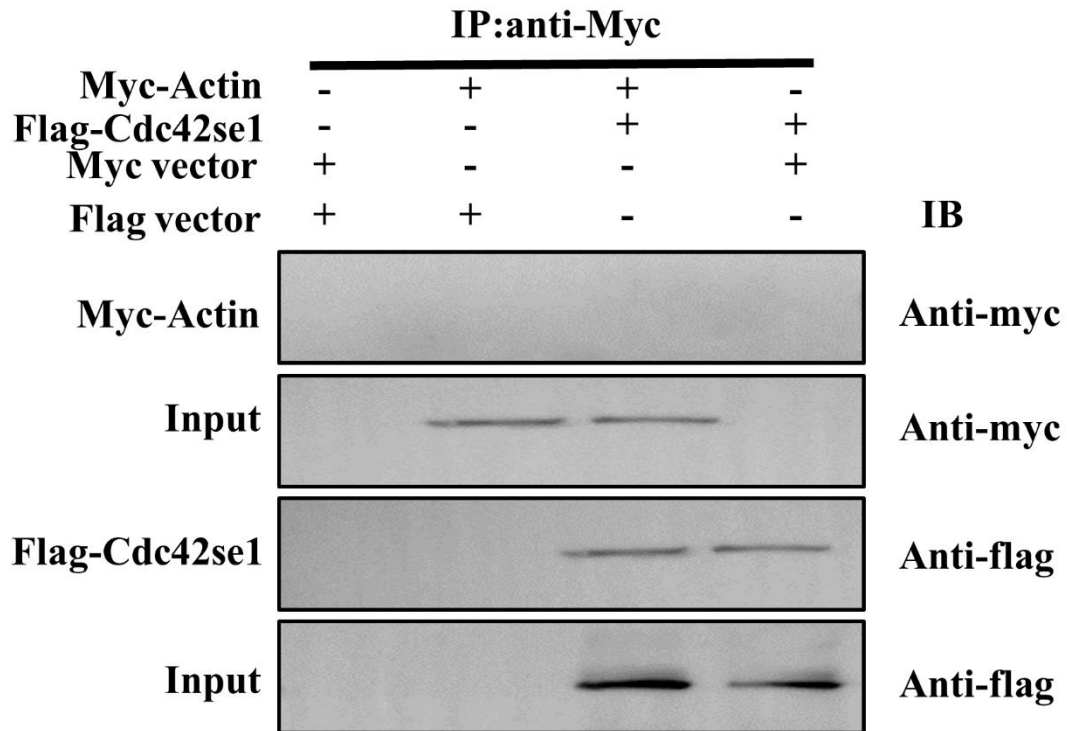

**Supplementary Figure S4.** Co-immunoprecipitation analysis indicated that Cdc42se1 does not interact with Actin. HEK293T cells were co-transfected with Myc-Actin and Flag-Cdc42 plasmids, and cells co-transfected with Flag or Myc vector were used as control. 24 hours later, cells were immunoprecipitated with anti-Flag Abs, followed by Western blot analysis.

**Table S1. The predicted target genes of miR-202-5p by both PITA and miRanda**

| Gene     | GeneBank ID  | Start | End  | Seed (se | ddG (c | Location            | Gene_sequence | Seed_sequence |
|----------|--------------|-------|------|----------|--------|---------------------|---------------|---------------|
| aars     | NM_001044310 | 278   | 271  | 7:00:00  | 1.36   | chr18:18647208-1864 | CATAGGAC      | GUCCUAUG      |
| abrab    | NM_001003986 | 30    | 22   | 8:00:00  | -6.61  | chr19:47180422-4718 | GCATAGGAA     | UUCCUAUGC     |
| acsbg2   | NM_001126379 | 85    | 78   | 7:00:00  | -6.84  | chr8:20158328-20160 | CATAGGAA      | UUCCUAUG      |
| adipoqb  | NM_001045425 | 170   | 162  | 8:01:00  | -4.73  | chr2:4649990-465019 | GCATAGGTT     | AACCUAUGC     |
| adralaa  | NM_001324454 | 232   | 225  | 7:00:00  | -2.17  | chr8:5024341-502462 | CATAGGAT      | AUCCUAUG      |
| adrb2b   | NM_001089471 | 874   | 867  | 7:00:00  | 5.43   | chr21:35044276-3504 | CATAGGAC      | GUCCUAUG      |
| aebp2    | NM_213494    | 751   | 744  | 7:00:00  | 0.19   | chr4:2997159-299801 | CATAGGAG      | CUCCUAUG      |
| ahcyl1   | NM_201293    | 315   | 308  | 7:00:00  | -2.12  | chr8:24952751-24954 | CATAGGAC      | GUCCUAUG      |
| akr1b1   | NM_001002048 | 37    | 30   | 7:00:00  | 3.08   | chr4:14907490-14907 | CATAGGAT      | AUCCUAUG      |
| ap1s3b   | NM_001004635 | 209   | 201  | 8:00:00  | -4.6   | chr2:47733074-47733 | GCATAGGAG     | CUCCUAUGC     |
| arl6ip4  | NM_001020758 | 117   | 110  | 7:00:00  | -6.68  | chr5:68973377-68973 | CATAGGAA      | UUCCUAUG      |
| arrb2a   | NM_214681    | 207   | 199  | 8:01:00  | -7.81  | chr10:22937317-2293 | GCATAGGCA     | UGCCUAUGC     |
| atp2b1b  | NM_001135631 | 465   | 457  | 8:00:00  | -12.3  | chr25:19511762-1951 | GCATAGGAT     | AUCCUAUGC     |
| atp5g1   | NM_213028    | 74    | 66   | 8:01:00  | -1.58  | chr3:23468746-23468 | GCATAGGCC     | GGCCUAUGC     |
| bmpr1b   | NM_131457    | 266   | 259  | 7:00:00  | -3.45  | chr5:6996909-699729 | CATAGGAG      | CUCCUAUG      |
| brd3b    | NM_212702    | 910   | 903  | 7:00:00  | 1.56   | chr5:63730841-63732 | CATAGGAC      | GUCCUAUG      |
| brms1    | NM_200097    | 239   | 232  | 7:00:00  | -3.07  | chr7:60110136-60110 | CATAGGAT      | AUCCUAUG      |
| bsg      | NM_001312882 | 868   | 861  | 7:00:00  | 0.75   | chr22:18917584-1892 | CATAGGAC      | GUCCUAUG      |
| bsg      | NM_198142    | 868   | 861  | 7:00:00  | 0.75   | chr22:18917584-1892 | CATAGGAC      | GUCCUAUG      |
| calm2a   | NM_199996    | 875   | 868  | 7:00:00  | -7.89  | chr13:8445610-84465 | CATAGGAT      | AUCCUAUG      |
| caprin1a | NM_001003484 | 362   | 355  | 7:00:00  | -0.51  | chr7:26746720-26747 | CATAGGAG      | CUCCUAUG      |
| cars     | NM_001118900 | 559   | 552  | 7:00:00  | -8.45  | chr7:31525084-31525 | CATAGGAG      | CUCCUAUG      |
| cbx6a    | NM_001003768 | 368   | 360  | 8:01:00  | -4.17  | chr22:29128511-2912 | GCATAGGCG     | CGCCUAUGC     |
| ccdc43   | NM_200658    | 327   | 320  | 7:00:00  | -7.11  | chr3:31472043-31473 | CATAGGAA      | UUCCUAUG      |
| ccdc6b   | NM_200241    | 740   | 732  | 8:01:00  | -5.6   | chr12:7577404-75788 | GCATAGGTC     | GACCUAUGC     |
| cc119b   | NM_001302701 | 142   | 135  | 7:00:00  | -3.85  | chr10:17822313-1782 | CATAGGAA      | UUCCUAUG      |
| cdc42se  | NM_200060    | 1179  | 1172 | 7:00:00  | 0.42   | chr16:38361861-3836 | CATAGGAG      | CUCCUAUG      |
| cdh6     | NM_001013520 | 495   | 488  | 7:00:00  | -5.28  | chr2:28393416-28395 | CATAGGAG      | CUCCUAUG      |
| cdk5     | NM_131719    | 103   | 96   | 7:00:00  | -0.99  | chr24:33880631-3388 | CATAGGAT      | AUCCUAUG      |
| cebpa    | NM_131885    | 469   | 461  | 8:00:00  | -2.31  | chr7:37813729-37815 | GCATAGGAC     | GUCCUAUGC     |
| chaf1a   | NM_001045013 | 160   | 153  | 7:00:00  | 0.68   | chr22:22251771-2225 | CATAGGAG      | CUCCUAUG      |
| chtopb   | NM_001077306 | 387   | 380  | 7:00:00  | 0.55   | chr16:28951760-2895 | CATAGGAT      | AUCCUAUG      |
| clasp1a  | NM_001115139 | 659   | 652  | 7:00:00  | -5.99  | chr9:38480193-38481 | CATAGGAT      | AUCCUAUG      |
| cldn11b  | NM_131772    | 849   | 842  | 7:00:00  | -0.33  | chr24:26294344-2629 | CATAGGAT      | AUCCUAUG      |
| cx44.1   | NM_131809    | 583   | 575  | 8:01:00  | -5.1   | chr1:46756494-46757 | GCATAGGTG     | CACCUAUGC     |
| dao.2    | NM_214732    | 235   | 227  | 8:00:00  | -6.97  | chr5:19666909-19667 | GCATAGGAG     | CUCCUAUGC     |
| dcps     | NM_205588    | 302   | 294  | 8:01:00  | -2.02  | chr10:39371361-3937 | GCATAGGTC     | GACCUAUGC     |
| ddi2     | NM_198375    | 1461  | 1454 | 7:00:00  | 1.04   | chr6:40563039-40565 | CATAGGAT      | AUCCUAUG      |
| derl1    | NM_213444    | 605   | 597  | 8:01:00  | -5.01  | chr16:25727904-2572 | GCATAGGTT     | AACCUAUGC     |
| dio2     | NM_212789    | 843   | 835  | 8:01:00  | -1.78  | chr17:16867700-1686 | GCATAGGCA     | UGCCUAUGC     |
| dmtn     | NM_001201409 | 888   | 880  | 8:01:00  | -2.6   | chr10:20189164-2019 | GCATAGGTG     | CACCUAUGC     |
| dnajc18  | NM_001113588 | 388   | 381  | 7:00:00  | -1.34  | chr21:30202854-3020 | CATAGGAA      | UUCCUAUG      |
| dnajc4   | NM_212677    | 844   | 837  | 7:00:00  | -2.88  | chr14:8188723-81905 | CATAGGAG      | CUCCUAUG      |
| dnajc5g  | NM_199623    | 419   | 411  | 8:00:00  | -1.7   | chr20:38861075-3886 | GCATAGGAA     | UUCCUAUGC     |
| dpp6     | NM_001115122 | 947   | 940  | 7:00:00  | 4.64   | chr2:12723928-12725 | CATAGGAC      | GUCCUAUG      |
| dyrk2    | NM_001044833 | 232   | 225  | 7:00:00  | -2.11  | chr4:13459768-13460 | CATAGGAT      | AUCCUAUG      |
| eaf1     | NM_001002115 | 125   | 118  | 7:00:00  | -9.4   | chr16:7014291-70148 | CATAGGAG      | CUCCUAUG      |
| ednrab   | NM_001310095 | 108   | 100  | 8:01:00  | -5.23  | chr23:45958860-4595 | GCATAGGCA     | UGCCUAUGC     |
| eif4a1a  | NM_198366    | 443   | 436  | 7:00:00  | -2.95  | chr7:26239339-26240 | CATAGGAT      | AUCCUAUG      |
| emx2     | NM_131280    | 311   | 303  | 8:00:00  | -8.27  | chr13:19195637-1919 | GCATAGGAC     | GUCCUAUGC     |
| ephb2b   | NM_001327743 | 4537  | 4530 | 7:00:00  | 3.77   | chr11:28171812-2817 | CATAGGAA      | UUCCUAUG      |
| eps8     | NM_200242    | 368   | 361  | 7:00:00  | -0.75  | chr4:117354-117908  | CATAGGAG      | CUCCUAUG      |
| erbb2ip  | NM_001193543 | 1255  | 1248 | 7:00:00  | -3.15  | chr10:15637980-1564 | CATAGGAA      | UUCCUAUG      |
| evx2     | NM_131232    | 1151  | 1143 | 8:01:00  | -1.91  | chr9:2004615-200630 | GCATAGGTT     | AACCUAUGC     |
| exosc4   | NM_200739    | 596   | 589  | 7:00:00  | -6.7   | chr2:1600322-160113 | CATAGGAA      | UUCCUAUG      |

|         |              |      |      |         |       |                     |           |           |
|---------|--------------|------|------|---------|-------|---------------------|-----------|-----------|
| eya2    | NM_001004558 | 807  | 799  | 8:00:00 | -4.31 | chr6:55925603-55927 | GCATAGGAT | AUCCUAUGC |
| ezrb    | NM_001030285 | 293  | 286  | 7:00:00 | -1.25 | chr20:13672076-1367 | CATAGGAT  | AUCCUAUG  |
| fl1r.1  | NM_001004667 | 65   | 57   | 8:01:00 | -5.47 | chr5:29247929-29248 | GCATAGGTT | AACCUAUGC |
| fam13b  | NM_001328042 | 1465 | 1457 | 8:00:00 | -1.52 | chr14:24019525-2402 | GCATAGGAT | AUCCUAUGC |
| fam234t | NM_207053    | 459  | 452  | 7:00:00 | -1.78 | chr3:1422721-142430 | CATAGGAG  | CUCCUAUG  |
| fam91a1 | NM_200441    | 254  | 247  | 7:00:00 | -4.13 | chr19:33549339-3355 | CATAGGAC  | GUCCUAUG  |
| fli1b   | NM_001008780 | 638  | 630  | 8:01:00 | -4.73 | chr16:42095548-4209 | GCATAGGTG | CACCUAUGC |
| flrt3   | NM_001256646 | 468  | 460  | 8:01:00 | 1.3   | chr13:33685823-3368 | GCATAGGTG | CACCUAUGC |
| foxf1   | NM_001080186 | 711  | 704  | 7:00:00 | -3.16 | chr18:30872112-3087 | CATAGGAA  | UUCCUAUG  |
| foxred2 | NM_001076660 | 146  | 139  | 7:00:00 | -5.58 | chr3:25901412-25901 | CATAGGAC  | GUCCUAUG  |
| ftr64   | NM_001327814 | 94   | 87   | 7:00:00 | -4.45 | chr4:70704351-70704 | CATAGGAA  | UUCCUAUG  |
| fyna    | NM_001007286 | 541  | 533  | 8:01:00 | -5.18 | chr17:15495032-1549 | GCATAGGTA | UACCUAUGC |
| gas1b   | NM_001077801 | 700  | 692  | 8:01:00 | -2.73 | chr5:31760184-31762 | GCATAGGTA | UACCUAUGC |
| ggact.1 | NM_001077717 | 193  | 186  | 7:00:00 | -1.21 | chr1:2306346-230752 | CATAGGAA  | UUCCUAUG  |
| gnrh3   | NM_182887    | 49   | 42   | 7:00:00 | -1.07 | chr17:20187335-2018 | CATAGGAG  | CUCCUAUG  |
| got2a   | NM_213379    | 59   | 52   | 7:00:00 | -2.16 | chr18:21189788-2119 | CATAGGAT  | AUCCUAUG  |
| gpt2    | NM_001098757 | 266  | 259  | 7:00:00 | -4.16 | chr7:41618824-41619 | CATAGGAA  | UUCCUAUG  |
| gsk3ab  | NM_131390    | 664  | 656  | 8:01:00 | -2.9  | chr16:11399732-1140 | GCATAGGTC | GACCUAUGC |
| gskip   | NM_213435    | 375  | 367  | 8:01:00 | -3.38 | chr17:43027101-4302 | GCATAGGTT | AACCUAUGC |
| hdlbpa  | NM_201474    | 721  | 714  | 7:00:00 | 1.58  | chr6:26884278-26886 | CATAGGAA  | UUCCUAUG  |
| hmbsa   | NM_201154    | 281  | 273  | 8:01:00 | -4.72 | chr5:29933405-29934 | GCATAGGTC | GACCUAUGC |
| hmox2a  | NM_001103139 | 56   | 48   | 8:01:00 | -8.82 | chr22:26995277-2699 | GCATAGGTC | GACCUAUGC |
| hsd11b1 | NM_200323    | 477  | 469  | 8:01:00 | -3.09 | chr22:19536916-1953 | GCATAGGCC | GGCCUAUGC |
| htra1b  | NM_001111182 | 486  | 479  | 7:00:00 | -2.13 | chr12:11350421-1135 | CATAGGAA  | UUCCUAUG  |
| igfbp3  | NM_205751    | 352  | 344  | 8:01:00 | -2.62 | chr20:6812249-68142 | GCATAGGTA | UACCUAUGC |
| il17rd  | NM_153660    | 447  | 439  | 8:01:00 | -2.35 | chr11:42428612-4242 | GCATAGGTC | GACCUAUGC |
| irf5    | NM_212875    | 1320 | 1313 | 7:00:00 | -7.57 | chr4:13606758-13609 | CATAGGAT  | AUCCUAUG  |
| itpk1a  | NM_213017    | 29   | 21   | 8:01:00 | -10.1 | chr20:27150435-2715 | GCATAGGTG | CACCUAUGC |
| jupa    | NM_131177    | 835  | 828  | 7:00:00 | -1.54 | chr11:11793967-1179 | CATAGGAG  | CUCCUAUG  |
| kat6a   | NM_001123312 | 498  | 491  | 7:00:00 | -3.17 | chr5:13892846-13895 | CATAGGAA  | UUCCUAUG  |
| klf1    | NM_130936    | 1049 | 1041 | 8:00:00 | -9.27 | chr6:7904178-790539 | GCATAGGAA | UUCCUAUGC |
| leprot  | NM_001017787 | 75   | 67   | 8:01:00 | -1.21 | chr2:14986542-14987 | GCATAGGTT | AACCUAUGC |
| lhx2b   | NM_001040010 | 896  | 888  | 8:01:00 | -7.64 | chr8:3041008-304262 | GCATAGGTA | UACCUAUGC |
| lhx6    | NM_001004015 | 369  | 362  | 7:00:00 | -4.16 | chr10:9559812-95616 | CATAGGAC  | GUCCUAUG  |
| lmbd2b  | NM_199944    | 1208 | 1200 | 8:01:00 | -5.92 | chr21:22384565-2238 | GCATAGGTG | CACCUAUGC |
| lnpa    | NM_199480    | 555  | 548  | 7:00:00 | -5.32 | chr9:2043962-204471 | CATAGGAA  | UUCCUAUG  |
| LOC100  | NM_001105607 | 477  | 469  | 8:01:00 | -3.09 | chr22:19536916-1953 | GCATAGGCC | GGCCUAUGC |
| LOC564  | NM_001128722 | 1326 | 1318 | 8:00:00 | -7.13 | chr5:13142950-13144 | GCATAGGAA | UUCCUAUGC |
| lonrf11 | NM_001277234 | 711  | 703  | 8:01:00 | -5.2  | chr8:13749288-13750 | GCATAGGTC | GACCUAUGC |
| lrrc17  | NM_205539    | 1187 | 1180 | 7:00:00 | -6.49 | chr4:20420216-20421 | CATAGGAT  | AUCCUAUG  |
| marcksb | NM_001015060 | 1391 | 1384 | 7:00:00 | -4.85 | chr17:15529292-1553 | CATAGGAA  | UUCCUAUG  |
| med22   | NM_001002144 | 315  | 308  | 7:00:00 | -7.94 | chr5:32690765-32691 | CATAGGAA  | UUCCUAUG  |
| mfsd8   | NM_001045048 | 187  | 180  | 7:00:00 | -3.83 | chr12:22522841-2252 | CATAGGAA  | UUCCUAUG  |
| micu2   | NM_001017539 | 335  | 328  | 7:00:00 | -0.4  | chr5:36008475-36009 | CATAGGAA  | UUCCUAUG  |
| mix11   | NM_130940    | 1142 | 1135 | 7:00:00 | 3.49  | chr20:43818084-4381 | CATAGGAA  | UUCCUAUG  |
| mllt1b  | NM_001040384 | 297  | 289  | 8:00:00 | -5.34 | chr2:23314490-23315 | GCATAGGAA | UUCCUAUGC |
| mob2b   | NM_001045317 | 1494 | 1486 | 8:01:00 | 0.6   | chr18:50040880-5004 | GCATAGGCA | UGCCUAUGC |
| mpp6a   | NM_001256189 | 227  | 220  | 7:00:00 | -6.45 | chr16:21636543-2164 | CATAGGAA  | UUCCUAUG  |
| msrb1a  | NM_178288    | 1954 | 1947 | 7:00:00 | -5.74 | chr3:18649165-18651 | CATAGGAT  | AUCCUAUG  |
| mtmr1a  | NM_001020721 | 51   | 44   | 7:00:00 | -2.65 | chr7:25605576-25605 | CATAGGAA  | UUCCUAUG  |
| mtus1a  | NM_001077608 | 498  | 491  | 7:00:00 | -3.15 | chr14:30015813-3001 | CATAGGAC  | GUCCUAUG  |
| mylipb  | NM_001080022 | 185  | 178  | 7:00:00 | -0.58 | chr16:25633214-2563 | CATAGGAG  | CUCCUAUG  |
| myo1cb  | NM_001317189 | 454  | 447  | 7:00:00 | -1.41 | chr15:28417089-2841 | CATAGGAA  | UUCCUAUG  |
| nagpa   | NM_001109715 | 468  | 461  | 7:00:00 | 0.72  | chr16:40591302-4059 | CATAGGAA  | UUCCUAUG  |
| nanos1  | NM_001305661 | 264  | 256  | 8:01:00 | -6.16 | chr14:4810925-48126 | GCATAGGTT | AACCUAUGC |
| nck2a   | NM_200997    | 519  | 512  | 7:00:00 | -2.13 | chr9:6417152-641838 | CATAGGAT  | AUCCUAUG  |
| nck2b   | NM_001003492 | 391  | 384  | 7:00:00 | -4.57 | chr6:15115528-15116 | CATAGGAG  | CUCCUAUG  |

|          |              |      |      |         |       |                     |           |           |
|----------|--------------|------|------|---------|-------|---------------------|-----------|-----------|
| ndfip11  | NM_001002503 | 1850 | 1843 | 7:00:00 | -3.03 | chr21:36240269-3624 | CATAGGAA  | UUCCUAUG  |
| ndufa4   | NM_213025    | 184  | 176  | 8:01:00 | -5.83 | chr12:9845658-98464 | GCATAGGTC | GACCUAUGC |
| neurod6  | NM_131817    | 155  | 147  | 8:01:00 | -2.25 | chr2:50894382-50894 | GCATAGGTC | GACCUAUGC |
| nfe2l3   | NM_213231    | 1271 | 1264 | 7:00:00 | -3.68 | chr19:18680740-1868 | CATAGGAC  | GUCCUAUG  |
| nitr13   | NM_001127254 | 87   | 80   | 7:00:00 | 5.07  | chr14:41210404-4121 | CATAGGAT  | AUCCUAUG  |
| nitr4a   | NM_198344    | 493  | 486  | 7:00:00 | -4.79 | chr7:17326090-17327 | CATAGGAC  | GUCCUAUG  |
| nkiras2  | NM_001003433 | 1257 | 1249 | 8:01:00 | 2.48  | chr3:17717386-17719 | GCATAGGTC | GACCUAUGC |
| nkx6.1   | NM_001002475 | 230  | 222  | 8:00:00 | -8.89 | chr21:19036452-1903 | GCATAGGAA | UUCCUAUGC |
| nr2e3    | NM_001007368 | 155  | 147  | 8:01:00 | -5.6  | chr25:22180616-2218 | GCATAGGTT | AACCUAUGC |
| nt5e     | NM_200932    | 118  | 111  | 7:00:00 | -2.66 | chr20:826874-827242 | CATAGGAG  | CUCCUAUG  |
| nucb2b   | NM_201479    | 309  | 302  | 7:00:00 | -1.76 | chr18:38228413-3822 | CATAGGAT  | AUCCUAUG  |
| oard1    | NM_001020755 | 242  | 234  | 8:01:00 | -9.61 | chr23:19294039-1929 | GCATAGGTA | UACCUAUGC |
| olfcw1   | NM_001018147 | 522  | 515  | 7:00:00 | -4.47 | chr18:32164914-3216 | CATAGGAG  | CUCCUAUG  |
| otud4    | NM_001312659 | 218  | 210  | 8:01:00 | -4.98 | chr23:43889846-4389 | GCATAGGTA | UACCUAUGC |
| oxsr1b   | NM_201175    | 154  | 147  | 7:00:00 | -6.9  | chr24:19919669-1992 | CATAGGAT  | AUCCUAUG  |
| pank1b   | NM_001083841 | 507  | 500  | 7:00:00 | 0.84  | chr12:16841623-1684 | CATAGGAT  | AUCCUAUG  |
| pdpk1a   | NM_001077344 | 513  | 505  | 8:00:00 | -3.74 | chr3:47333757-47334 | GCATAGGAT | AUCCUAUGC |
| pdzk1ip  | NM_001007760 | 2097 | 2090 | 7:00:00 | -3.29 | chr22:16536950-1654 | CATAGGAA  | UUCCUAUG  |
| pias4a   | NM_213403    | 1671 | 1663 | 8:00:00 | -5.8  | chr22:20381881-2038 | GCATAGGAA | UUCCUAUGC |
| pon2     | NM_212734    | 24   | 17   | 7:00:00 | -4.73 | chr16:24754851-2475 | CATAGGAG  | CUCCUAUG  |
| ppm1bb   | NM_001007313 | 111  | 104  | 7:00:00 | -3.25 | chr12:25391925-2539 | CATAGGAA  | UUCCUAUG  |
| ppm1da   | NM_201090    | 754  | 747  | 7:00:00 | -5.13 | chr15:27005772-2700 | CATAGGAT  | AUCCUAUG  |
| ppm1k    | NM_001327744 | 1224 | 1217 | 7:00:00 | -3.87 | chr1:49949885-49952 | CATAGGAA  | UUCCUAUG  |
| ppp3cca  | NM_001166628 | 36   | 29   | 7:00:00 | -6.71 | chr5:27324613-27324 | CATAGGAT  | AUCCUAUG  |
| prdm12l  | NM_001007457 | 513  | 506  | 7:00:00 | -6.83 | chr5:62817118-62817 | CATAGGAT  | AUCCUAUG  |
| prfl.6   | NM_001089507 | 1021 | 1013 | 8:01:00 | -6.41 | chr8:29661295-29662 | GCATAGGCA | UGCCUAUGC |
| proza    | NM_001327792 | 1593 | 1586 | 7:00:00 | -4.05 | chr3:62146031-62147 | CATAGGAA  | UUCCUAUG  |
| prrg4    | NM_001017637 | 416  | 409  | 7:00:00 | -9.09 | chr18:45676964-4567 | CATAGGAC  | GUCCUAUG  |
| purba    | NM_001160159 | 1326 | 1318 | 8:00:00 | -7.13 | chr5:13142950-13144 | GCATAGGAA | UUCCUAUGC |
| pycrl    | NM_001044938 | 712  | 704  | 8:01:00 | 0.74  | chr20:52735058-5273 | GCATAGGTT | AACCUAUGC |
| rab10    | NM_001002566 | 141  | 134  | 7:00:00 | -2.08 | chr20:47540149-4754 | CATAGGAT  | AUCCUAUG  |
| rab32a   | NM_201332    | 339  | 332  | 7:00:00 | -7.66 | chr20:32106394-3210 | CATAGGAC  | GUCCUAUG  |
| rassfl   | NM_001004550 | 312  | 305  | 7:00:00 | -8.5  | chr22:10628371-1062 | CATAGGAA  | UUCCUAUG  |
| rdh12l   | NM_001009912 | 142  | 135  | 7:00:00 | -3.89 | chr24:32659260-3265 | CATAGGAT  | AUCCUAUG  |
| rhbdl2   | NM_201204    | 1087 | 1079 | 8:00:00 | -11.3 | chr16:33197256-3319 | GCATAGGAA | UUCCUAUGC |
| rhogb    | NM_200040    | 56   | 48   | 8:00:00 | -16.4 | chr21:30913981-3091 | GCATAGGAA | UUCCUAUGC |
| rpe      | NM_001243424 | 582  | 575  | 7:00:00 | -5.84 | chr9:24214640-24215 | CATAGGAA  | UUCCUAUG  |
| scn8aa   | NM_131628    | 492  | 485  | 7:00:00 | -6.24 | chr23:27325088-2732 | CATAGGAG  | CUCCUAUG  |
| sebox    | NM_001320052 | 152  | 145  | 7:00:00 | 13.71 | chr5:66700255-66703 | CATAGGAT  | AUCCUAUG  |
| sec61a1  | NM_153659    | 645  | 637  | 8:00:00 | -4.22 | chr6:40067674-40068 | GCATAGGAG | CUCCUAUGC |
| sepn1    | NM_001004294 | 351  | 344  | 7:00:00 | -3.39 | chr17:24675781-2467 | CATAGGAT  | AUCCUAUG  |
| sertad2b | NM_212794    | 1663 | 1655 | 8:01:00 | 2.61  | chr13:24389817-2439 | GCATAGGCG | CGCCUAUGC |
| sesn3    | NM_213519    | 900  | 892  | 8:00:00 | -7.73 | chr15:35232597-3523 | GCATAGGAC | GUCCUAUGC |
| setdb1a  | NM_001044767 | 78   | 71   | 7:00:00 | -0.14 | chr19:9225231-92254 | CATAGGAG  | CUCCUAUG  |
| sfrp1b   | NM_001083571 | 355  | 347  | 8:00:00 | -2.05 | chr10:20394032-2039 | GCATAGGAT | AUCCUAUGC |
| sfxn5a   | NM_001243309 | 163  | 156  | 7:00:00 | -5.19 | chr13:14889830-1489 | CATAGGAT  | AUCCUAUG  |
| sh2b1    | NM_001110455 | 309  | 301  | 8:00:00 | -6.05 | chr3:15241942-15242 | GCATAGGAA | UUCCUAUGC |
| sh3bgr   | NM_001003524 | 1217 | 1210 | 7:00:00 | -0.28 | chr15:5975386-59808 | CATAGGAT  | AUCCUAUG  |
| shisa2   | NM_001003631 | 161  | 154  | 7:00:00 | -0.29 | chr5:21566176-21566 | CATAGGAG  | CUCCUAUG  |
| si:ch211 | NM_001145765 | 45   | 38   | 7:00:00 | -5.79 | chr13:32991446-3299 | CATAGGAG  | CUCCUAUG  |
| si:ch211 | NM_001305574 | 112  | 105  | 7:00:00 | -4.29 | chr15:14148895-1414 | CATAGGAA  | UUCCUAUG  |
| si:ch211 | NM_001145579 | 1348 | 1340 | 8:01:00 | -0.51 | chr13:18380131-1838 | GCATAGGTT | AACCUAUGC |
| si:ch211 | NM_001017868 | 413  | 406  | 7:00:00 | -5.32 | chr21:2278389-22791 | CATAGGAA  | UUCCUAUG  |
| si:ch73- | NM_001122628 | 153  | 146  | 7:00:00 | -3.05 | chr23:4453253-44537 | CATAGGAA  | UUCCUAUG  |
| si:dkey- | NM_001326551 | 145  | 137  | 8:01:00 | -3.04 | chr5:66784439-66784 | GCATAGGCC | GGCCUAUGC |
| si:dkey- | NM_001130400 | 980  | 972  | 8:01:00 | 4.28  | chr9:36031369-36033 | GCATAGGTG | CACCUAUGC |
| si:dkey- | NM_001303054 | 32   | 25   | 7:00:00 | -1.54 | chr1:22167011-22167 | CATAGGAA  | UUCCUAUG  |



|          |              |      |      |         |       |                     |           |           |
|----------|--------------|------|------|---------|-------|---------------------|-----------|-----------|
| slc18a3a | NM_001077550 | 389  | 382  | 7:00:00 | -0.1  | chr13:29291599-2929 | CATAGGAA  | UUCCUAUG  |
| slc25a1  | NM_205715    | 266  | 258  | 8:01:00 | -3.07 | chr3:13337647-13338 | GCATAGGCG | CGCCUAUGC |
| slc26a6l | NM_001114417 | 70   | 63   | 7:00:00 | -4.53 | chr6:40734680-40735 | CATAGGAT  | AUCCUAUG  |
| slc29a2  | NM_001012501 | 369  | 362  | 7:00:00 | -4.57 | chr21:27370798-2737 | CATAGGAC  | GUCCUAUG  |
| slit1a   | NM_001034968 | 434  | 427  | 7:00:00 | -2.37 | chr13:425029-426646 | CATAGGAG  | CUCCUAUG  |
| smad5    | NM_131368    | 178  | 170  | 8:00:00 | -5.82 | chr14:26169095-2616 | GCATAGGAA | UUCCUAUGC |
| sod3a    | NM_001099236 | 288  | 281  | 7:00:00 | -5.86 | chr7:71099876-71100 | CATAGGAC  | GUCCUAUG  |
| sp8a     | NM_213241    | 944  | 937  | 7:00:00 | -1.72 | chr19:2483468-24846 | CATAGGAT  | AUCCUAUG  |
| spra     | NM_001024430 | 1521 | 1514 | 7:00:00 | -5.37 | chr5:71345202-71346 | CATAGGAG  | CUCCUAUG  |
| srebf2   | NM_001089466 | 463  | 456  | 7:00:00 | -3.22 | chr3:1361296-136224 | CATAGGAA  | UUCCUAUG  |
| srsf1a   | NM_213015    | 833  | 826  | 7:00:00 | 0.75  | chr15:16136061-1613 | CATAGGAT  | AUCCUAUG  |
| srsf1b   | NM_200593    | 1411 | 1404 | 7:00:00 | -0.37 | chr21:39523837-3952 | CATAGGAG  | CUCCUAUG  |
| ssh2b    | NM_001135103 | 531  | 523  | 8:00:00 | -10.4 | chr21:40452175-4045 | GCATAGGAA | UUCCUAUGC |
| stat1b   | NM_200091    | 103  | 96   | 7:00:00 | -5.11 | chr9:41444460-41445 | CATAGGAG  | CUCCUAUG  |
| stmn1b   | NM_001017850 | 293  | 285  | 8:01:00 | -6.18 | chr16:34572058-3457 | GCATAGGTC | GACCUAUGC |
| stxbp3   | NM_213471    | 523  | 516  | 7:00:00 | -3.86 | chr23:1688463-16895 | CATAGGAA  | UUCCUAUG  |
| suv39h1  | NM_001126482 | 1043 | 1035 | 8:01:00 | -0.15 | chr8:25731824-25733 | GCATAGGTT | AACCUAUGC |
| syncrip  | NM_214696    | 339  | 332  | 7:00:00 | -7.07 | chr20:2725211-27258 | CATAGGAA  | UUCCUAUG  |
| syt1a    | NM_001327829 | 1938 | 1931 | 7:00:00 | -2.09 | chr4:21590705-21594 | CATAGGAG  | CUCCUAUG  |
| tada2b   | NM_001024443 | 167  | 160  | 7:00:00 | -3.53 | chr7:39470460-39470 | CATAGGAA  | UUCCUAUG  |
| tbl1xr1a | NM_001020583 | 171  | 163  | 8:00:00 | -4.75 | chr11:8665727-86669 | GCATAGGAG | CUCCUAUGC |
| tbx15    | NM_153664    | 700  | 693  | 7:00:00 | -5.22 | chr9:21224026-21224 | CATAGGAA  | UUCCUAUG  |
| tcf3b    | NM_001172683 | 289  | 282  | 7:00:00 | -1.57 | chr22:20288330-2029 | CATAGGAA  | UUCCUAUG  |
| tfap2b   | NM_001024665 | 1400 | 1393 | 7:00:00 | -3.62 | chr20:48211718-4821 | CATAGGAA  | UUCCUAUG  |
| tgfbr2   | NM_182855    | 264  | 257  | 7:00:00 | -1.78 | chr16:39555136-3955 | CATAGGAG  | CUCCUAUG  |
| thbs4a   | NM_001114424 | 45   | 38   | 7:00:00 | -2.44 | chr5:51295571-51296 | CATAGGAG  | CUCCUAUG  |
| tlx3b    | NM_170766    | 775  | 767  | 8:00:00 | -10.4 | chr10:22081602-2208 | GCATAGGAC | GUCCUAUGC |
| tmem17   | NM_001098391 | 1278 | 1271 | 7:00:00 | -6.09 | chr25:28150339-2815 | CATAGGAA  | UUCCUAUG  |
| tmem18   | NM_213520    | 1268 | 1261 | 7:00:00 | -0.74 | chr3:42250307-42251 | CATAGGAA  | UUCCUAUG  |
| tmem18   | NM_001017718 | 2034 | 2027 | 7:00:00 | -5.16 | chr12:19216157-1921 | CATAGGAA  | UUCCUAUG  |
| tmem23   | NM_200387    | 251  | 243  | 8:01:00 | -5.2  | chr25:34354564-3435 | GCATAGGCC | GGCCUAUGC |
| tmem24   | NM_001077341 | 80   | 73   | 7:00:00 | -1.77 | chr11:30393506-3039 | CATAGGAG  | CUCCUAUG  |
| tmem51   | NM_001077730 | 309  | 302  | 7:00:00 | -3.15 | chr8:26681899-26682 | CATAGGAC  | GUCCUAUG  |
| tnfrsf19 | NM_001044904 | 1785 | 1778 | 7:00:00 | -6.67 | chr15:8259460-82613 | CATAGGAA  | UUCCUAUG  |
| tpma     | NM_131105    | 379  | 372  | 7:00:00 | -4.39 | chr7:29689005-29689 | CATAGGAA  | UUCCUAUG  |
| trh      | NM_001012365 | 496  | 489  | 7:00:00 | 1.06  | chr8:54107709-54108 | CATAGGAA  | UUCCUAUG  |
| trmt44   | NM_001006086 | 154  | 146  | 8:01:00 | -7.43 | chr7:59414436-59414 | GCATAGGTT | AACCUAUGC |
| tspan7   | NM_214774    | 1025 | 1017 | 8:00:00 | -5.17 | chr14:41102224-4110 | GCATAGGAA | UUCCUAUGC |
| tspan7b  | NM_001130818 | 430  | 422  | 8:00:00 | -4.06 | chr22:11411023-1141 | GCATAGGAT | AUCCUAUGC |
| tyrobp   | NM_001100103 | 67   | 59   | 8:01:00 | -5.76 | chr16:25285345-2528 | GCATAGGTT | AACCUAUGC |
| uba3     | NM_213467    | 229  | 222  | 7:00:00 | -10.9 | chr11:17650547-1765 | CATAGGAG  | CUCCUAUG  |
| ube2g1b  | NM_213530    | 287  | 280  | 7:00:00 | -2.46 | chr21:16994999-1699 | CATAGGAT  | AUCCUAUG  |
| ubiad1   | NM_001199726 | 526  | 518  | 8:01:00 | -5.23 | chr8:53587152-53588 | GCATAGGCT | AGCCUAUGC |
| vamp5    | NM_001256607 | 726  | 719  | 7:00:00 | -1.89 | chr5:27706410-27707 | CATAGGAG  | CUCCUAUG  |
| vip      | NM_001114553 | 67   | 59   | 8:00:00 | -5.69 | chr13:46698116-4669 | GCATAGGAC | GUCCUAUGC |
| vps36    | NM_199977    | 377  | 370  | 7:00:00 | -12.4 | chr10:24707416-2470 | CATAGGAA  | UUCCUAUG  |
| vrk3     | NM_001013568 | 30   | 23   | 7:00:00 | -4.6  | chr7:28807271-28809 | CATAGGAG  | CUCCUAUG  |
| vsig10   | NM_001100094 | 284  | 276  | 8:01:00 | -8.72 | chr5:12062664-12062 | GCATAGGTG | CACCUAUGC |
| wdr48a   | NM_001077795 | 142  | 134  | 8:00:00 | -2.54 | chr24:41176453-4117 | GCATAGGAG | CUCCUAUGC |
| xpot     | NM_001044852 | 541  | 533  | 8:01:00 | -4.66 | chr4:661385-661970  | GCATAGGTT | AACCUAUGC |
| yaf2     | NM_001045268 | 144  | 137  | 7:00:00 | -0.57 | chr4:13906673-13907 | CATAGGAT  | AUCCUAUG  |
| yars     | NM_201316    | 148  | 140  | 8:00:00 | -3.74 | chr19:31307431-3130 | GCATAGGAG | CUCCUAUGC |
| zdhhc5a  | NM_001039640 | 1211 | 1204 | 7:00:00 | -5.67 | chr1:43863753-43865 | CATAGGAT  | AUCCUAUG  |
| zdhhc7   | NM_001002602 | 54   | 47   | 7:00:00 | 1.82  | chr18:5215312-52156 | CATAGGAC  | GUCCUAUG  |
| zfand5a  | NM_213039    | 250  | 242  | 8:00:00 | -2.94 | chr5:25092977-25094 | GCATAGGAC | GUCCUAUGC |
| zgc:100  | NM_001003528 | 1421 | 1414 | 7:00:00 | -1.26 | chr20:52716748-5272 | CATAGGAG  | CUCCUAUG  |
| zgc:101  | NM_001044327 | 224  | 217  | 7:00:00 | -4.44 | chr22:1406955-14075 | CATAGGAA  | UUCCUAUG  |



|         |              |      |      |         |       |                      |           |           |
|---------|--------------|------|------|---------|-------|----------------------|-----------|-----------|
| zgc:113 | NM_001030240 | 461  | 454  | 7:00:00 | -0.3  | chr2:303094-303870:- | CATAGGAA  | UUCCUAUG  |
| zgc:153 | NM_001045430 | 102  | 94   | 8:01:00 | 0.67  | chr5:29069447-29069  | GCATAGGCC | GGCCUAUGC |
| zgc:158 | NM_001123055 | 2985 | 2977 | 8:00:00 | -5.61 | chr7:64319006-64323  | GCATAGGAG | CUCCUAUGC |
| zgc:158 | NM_001080628 | 1214 | 1206 | 8:00:00 | -8.1  | chr19:29687162-2968  | GCATAGGAA | UUCCUAUGC |
| zgc:162 | NM_001082979 | 369  | 361  | 8:00:00 | -7.45 | chr14:8313012-83134  | GCATAGGAT | AUCCUAUGC |
| zgc:172 | NM_001128299 | 367  | 359  | 8:01:00 | -2.42 | chr3:1243248-124402  | GCATAGGCA | UGCCUAUGC |
| zgc:174 | NM_001113584 | 515  | 507  | 8:00:00 | -4.51 | chr16:13968502-1396  | GCATAGGAA | UUCCUAUGC |
| zgc:562 | NM_200217    | 3290 | 3282 | 8:01:00 | -4.31 | chr10:3317274-33220  | GCATAGGTT | AACCUAUGC |
| zgc:566 | NM_199737    | 40   | 33   | 7:00:00 | -5.9  | chr18:13225400-1322  | CATAGGAA  | UUCCUAUG  |
| zgc:567 | NM_200116    | 158  | 150  | 8:00:00 | -8.47 | chr3:17910815-17912  | GCATAGGAA | UUCCUAUGC |
| zgc:664 | NM_200527    | 26   | 18   | 8:00:00 | -11.7 | chr13:24556812-2455  | GCATAGGAA | UUCCUAUGC |
| zgc:664 | NM_200055    | 384  | 377  | 7:00:00 | -4.64 | chr8:25688928-25690  | CATAGGAG  | CUCCUAUG  |
| zgc:778 | NM_199602    | 212  | 205  | 7:00:00 | -2.19 | chr1:8017621-801857  | CATAGGAT  | AUCCUAUG  |
| zgc:921 | NM_001004593 | 847  | 839  | 8:01:00 | -8.21 | chr8:19370668-19372  | GCATAGGCC | GGCCUAUGC |
| zmp:000 | NM_001204200 | 5688 | 5680 | 8:00:00 | -6.59 | chr10:4910698-49183  | GCATAGGAT | AUCCUAUGC |
| znf1117 | NM_001327996 | 421  | 413  | 8:00:00 | -8.85 | chr4:67843794-67844  | GCATAGGAA | UUCCUAUGC |
| znf451  | NM_001013496 | 318  | 310  | 8:01:00 | -2.82 | chr22:1343538-13442  | GCATAGGTC | GACCUAUGC |
| znf513  | NM_001309467 | 472  | 465  | 7:00:00 | -3.77 | chr20:19531790-1953  | CATAGGAA  | UUCCUAUG  |
| znf800b | NM_200436    | 656  | 648  | 8:01:00 | 2.3   | chr4:3461029-346204  | GCATAGGCT | AGCCUAUGC |
| znf865  | NM_001083075 | 77   | 70   | 7:00:00 | 0.26  | chr19:10282245-1028  | CATAGGAC  | GUCCUAUG  |

**Supplementary Table S2. Primer information.**

| Primer name                     | Primer Sequence (5'-3')                | Description                            |
|---------------------------------|----------------------------------------|----------------------------------------|
| 18s rRNA-F                      | TCGCTAGTTGGCATCGTTTATG                 | qRT-PCR                                |
| 18s rRNA-R                      | CGGAGGTTTCGAAGACGATCA                  |                                        |
| <i>Cdc42se1</i> -F-RT           | GCGTTCTGGCATAAGATTGG                   |                                        |
| <i>Cdc42se1</i> -R-RT           | GGCGTGAGGCACCTTTGGAT                   |                                        |
| Vasa-F-RT                       | GGCTCCCACCAGAGAACTTATC                 |                                        |
| Vasa-R-RT                       | AGGTCGTACACAGGTCCCGTA                  |                                        |
| <i>Cdc42</i> -F-RT              | CGTCGTTGTTGGTGATGGTG                   |                                        |
| <i>Cdc42</i> -R-RT              | GCAGTATCAAACAGCCCCAGG                  |                                        |
| <i>MiR</i> -202-5p-RT           | TTCCTATGCATATACCTCTTTG                 |                                        |
| <i>MRQ</i> -3'-R                | TTTTTTTTTTTTTTTTTTTT                   |                                        |
| <i>Cdc42</i> -pro-Kpn I-F       | GGGGTACCTTTGTGGTGGAGGAAACATT           |                                        |
| <i>Cdc42</i> -pro-Hind III-R    | CCCAAGCTTAGCTGTGCTTTTATAAATCC          |                                        |
| <i>Cdc42se1</i> -Xho I-F        | CCGCTCGAGTCGGAGAGCCCACAAACT            | PsiCHECK2                              |
| <i>Cdc42se1</i> -Not I-R        | ATAAGAATGCGGCCGCAATTTCCAAGGACCACGG     |                                        |
| <i>Cdc42se1</i> -Mir Mut-F      | TACACGCGAGAGCCTAAG                     |                                        |
| <i>Cdc42se1</i> -Mir Mut-R      | TTAGGCTCTCGCGTGTAG                     |                                        |
| <i>Cdc42se1</i> -ORF-F          | CGGGATCCGTCGCTGAGTGTTGAGGATTA          | pCS2+ mRNA synthesis                   |
| <i>Cdc42se1</i> -ORF-R          | GCTCTAGACGTTTAGGTTGAGGATACTTT          |                                        |
| <i>Cdc42se1</i> -ORF-3'UTR-F    | GGAATTCATGAGTGCCTTCTGGCATAAGA          |                                        |
| <i>Cdc42se1</i> -ORF-3'UTR-R    | GCTCTAGAATTCTTCTAAAACAGCCC             |                                        |
| <i>Cdc42</i> -ORF-F             | CGGGATCCCGTTCTGGAAACCCCAAGCG           |                                        |
| <i>Cdc42</i> -ORF-R             | GCTCTAGAGCGGGAAGTGTGGGGAGTTAGA         |                                        |
| <i>Cdc42se1</i> -ORF-F          | CGGGATCCGTCGCTGAGTGTTGAGGATTA          | pCDNA3.1-<br><i>cdc42se1</i>           |
| <i>Cdc42se1</i> -Not I-R        | ATAAGAATGCGGCCGCAATTTCCAAGGACCACGG     |                                        |
| <i>Cdc42-Q61L-F1</i>            | GGAATTCATGCAGACGATCAAGTG               | pEGFPN3-<br><i>Cdc42Q61L</i>           |
| <i>Cdc42-Q61L-F2</i>            | CAGACCTGCAGTATCAAA                     |                                        |
| <i>Cdc42-Q61L-R1</i>            | TTTGATACTGCAGGTCTG                     |                                        |
| <i>Cdc42-Q61L-R2</i>            | CGGGATCCAAATATACAGCACTCCG              |                                        |
| <i>Cdc42se1</i> -Flag-EcoR I-F  | GGAATTCGGAGTGCCTTCTGGCATAAGA           | pCMV-Myc/Flag<br>expression<br>plasmid |
| <i>Cdc42se1</i> -Flag-EcoR I-R  | CCGCTCGAGATTCTTCTAAAACAGCCC            |                                        |
| <i>Cdc42</i> -Myc/Flag-EcoR I-F | GGAATTCGCAGACGATCAAGTGC                |                                        |
| <i>Cdc42</i> -Myc/Flag-Xho I-R  | CCGCTCGAGTTAAAATATACAGCACTCCG          |                                        |
| <i>Actin</i> -Myc-EcoR I-F      | GGAATTCGGGATGAGGAAATCGCTGC             |                                        |
| <i>Actin</i> -Myc-Xho I-R       | CCGCTCGAGTAAGAAGCACTTCTGTG             |                                        |
| Vasa-F                          | AGATCTCAACCACAAGCATCCA                 | <i>In situ</i><br>hybridization        |
| Vasa-R-T7                       | TAATACGACTCACTATATGTTACAGTCAGTCACT     |                                        |
| <i>Cdc42se1</i> -R-T7           | TAATACGACTCACTATAGCAGTATCAAACAGCCCCAGG |                                        |
| <i>miR</i> -202 GF              | AAACATCTTTTAGTGGCACT                   | miR-202<br>phenotype                   |
| <i>miR</i> -202 GR              | GACTTTTATTTTGCAT                       |                                        |
